# Supplementary material for: Antibiotic overuse in the primary health care setting: a secondary data analysis of standardised patient studies from India, China and Kenya
Source: PubMed Central journal article supplement (PMC7493125; doi:10.1136/bmjgh-2020-003393), 2020-09-15
Supplement: bmjgh-2020-003393supp002.pdf [file bmjgh-2020-003393supp002.pdf]

## Supplementary File 2

## Frequency of antibiotics dispensed in pharmacies, overall and according to both the AWaRe (Access – Watch – Reserve) and ATC (Anatomical – Therapeutic – Chemical) classifications.

| Drug type                   | Udupi district, Karnataka |                     | Mumbai, Delhi and Patna |                     |
|-----------------------------|---------------------------|---------------------|-------------------------|---------------------|
|                             | N                         | Proportion (95% CI) | N                       | Proportion (95% CI) |
| <b>Any antibiotic</b>       | 55                        | -                   | 344                     | -                   |
| <b>AWaRe Classification</b> |                           |                     |                         |                     |
| Access                      | 16                        | 29.1 (16.4; 40.0)   | 172                     | 50.0 (45.1; 55.2)   |
| Watch                       | 12                        | 21.8 (12.7; 32.7)   | 170                     | 49.4 (43.9; 54.4)   |
| Reserve                     | 0                         | -                   | 0                       | -                   |
| Discouraged                 | 25                        | 45.5 (32.7; 58.2)   | 2                       | 0.6 (0.3; 1.5)      |
| Other*                      | 2                         | 3.6 (1.8; 9.1)      | 0                       | -                   |
| <b>ATC Classification</b>   |                           |                     |                         |                     |
| Penicillin                  | 11                        | 20.0 (9.1; 30.9)    | 163                     | 47.4 (41.9; 52.3)   |
| Cephalosporin               | 5                         | 9.1 (3.6; 16.4)     | 38                      | 11.0 (7.8; 14.5)    |
| Macrolide                   | 1                         | 1.8 (1.8; 7.3)      | 57                      | 16.6 (12.5; 20.6)   |
| Quinolone                   | 6                         | 10.9 (3.6; 20.0)    | 81                      | 23.5 (18.6; 28.2)   |
| Tetracycline                | 0                         | -                   | 2                       | 0.6 (0.3; 1.5)      |
| Imidazole†                  | 5                         | 9.1 (1.8; 18.2)     | 0                       | -                   |
| Combinations#               | 25                        | 45.5 (32.7; 58.2)   | 2                       | 0.6 (0.3; 1.5)      |
| Other antibiotics§          | 2                         | 3.6 (1.8; 9.1)      | 1                       | 0.3 (0.29; 0.9)     |

Note: The unit of analysis is the individual drug, not the SP-provider interaction.

\* In the Udupi study, antibiotics classified as “other” were all quiniodochlor.

† Only metronidazole was dispensed.

# This category does not include combinations of anti-mycobacterial drugs.

§ Quiniodochlor in the Udupi study and chloramphenicol in the other study.
